# Supplementary material
Source: MDPI journal article supplement (https://www.mdpi.com/2036-7481/13/3/28)
Supplement: s1 [file s1]

Supplementary Table S1

**Table S1.** Oligonucleotide primer pairs used for RT-qPCR analysis.

| Gene                                                                      | Prime sequences Forward (1st line) and<br>Reverse (2nd line)<br>(5' → 3') | Annealing<br>temperature | Amplicon<br>size |
|---------------------------------------------------------------------------|---------------------------------------------------------------------------|--------------------------|------------------|
| Chitinase Class I<br>(PR3)                                                | CGTCTCTAGTATTCTCGCTG<br>AGCACACGCACGACAGTTG                               | 55 °C                    | 173 bp           |
| <i>Peroxidase 12</i><br>( <i>POD</i> )                                    | GTCTTGGTGGGGTCTTGG<br>CCTGCTTGAACCTTTCTTG                                 | 58 °C                    | 142 bp           |
| <i>Lipoxygenase 2</i><br>( <i>LOX</i> )                                   | TCTACGCCTGGGGTTACTG<br>TGCCTTTTGGTTTGTATGGAC                              | 58 °C                    | 161 bp           |
| <i>Phenylalanine<br/>ammonia lyase</i><br>( <i>PAL</i> )                  | CCTGAACTCCGCCACCATGCG<br>GGCCACGACCCTCTCAACTGG                            | 68 °C                    | 93 bp            |
| <i>Ethylene<br/>Response<br/>Sensor (ERS)</i>                             | GTATCTTGCTGCTGTTGTGTC<br>CCATCTCCCTGTCAAGTTC                              | 58 °C                    | 95 bp            |
| <i>NADP dependent<br/>isocitrate<br/>dehydrogenase</i><br>( <i>NDID</i> ) | GTCGTCACCTCTCTTTTACG<br>TCATTTTCATCACCGTCCATC                             | 55 °C                    | 98 bp            |
